# Supplementary material
Source: PubMed Central journal article supplement (PMC548977)

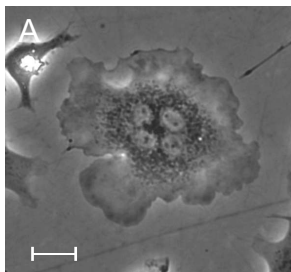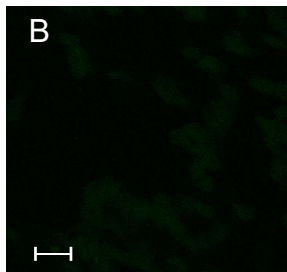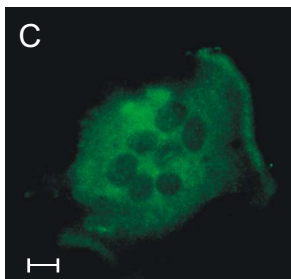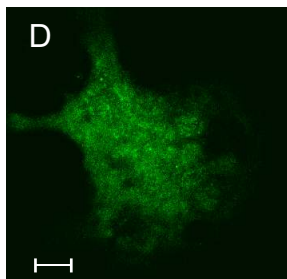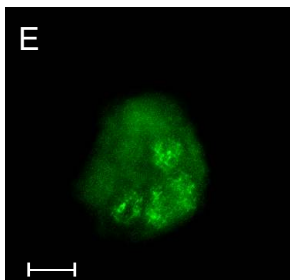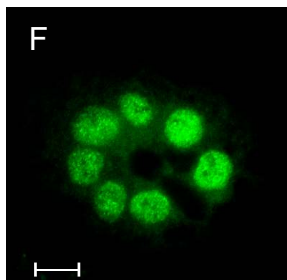

Supplement: pnas_102_7_2643__2.pdf [file pnas_102_7_2643__2.pdf]

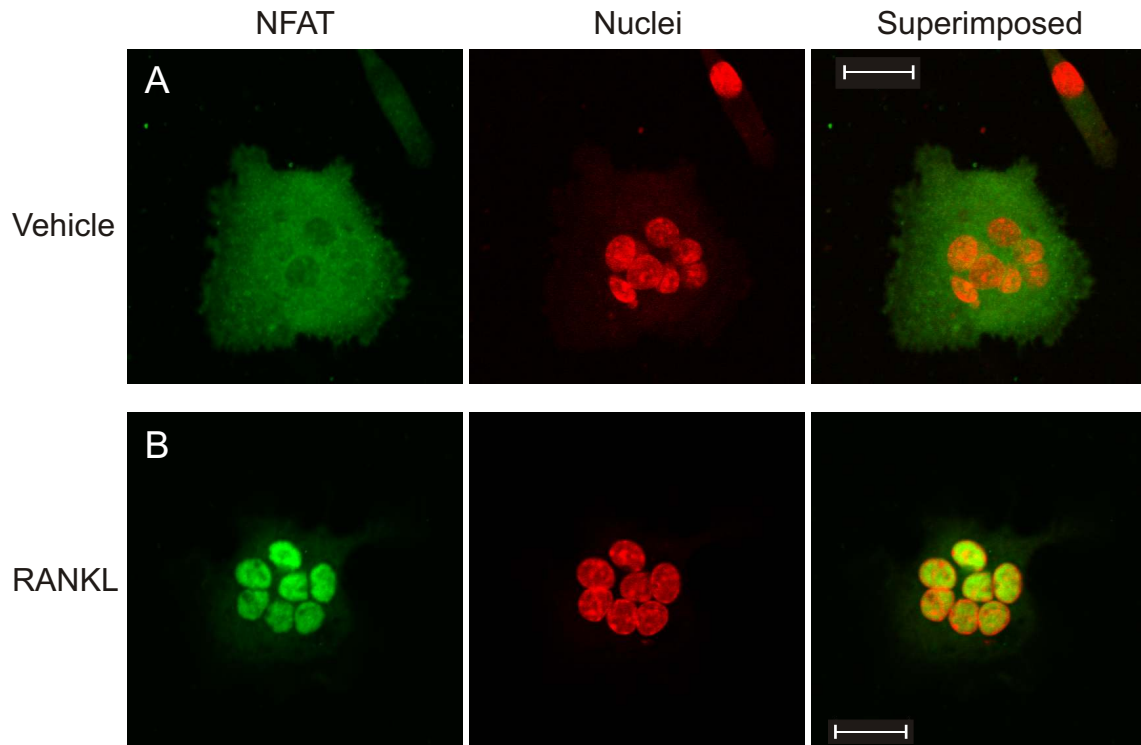

Supplement: pnas_102_7_2643__3.pdf [file pnas_102_7_2643__3.pdf]

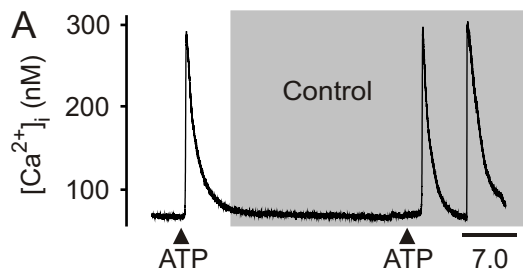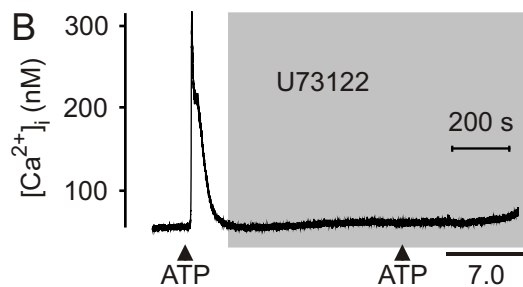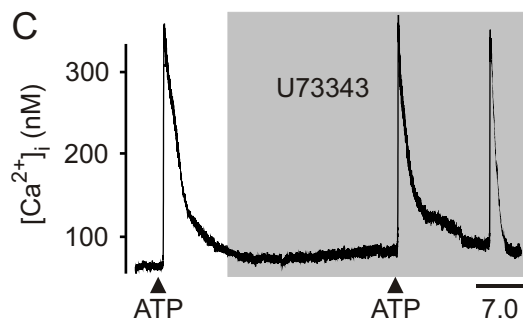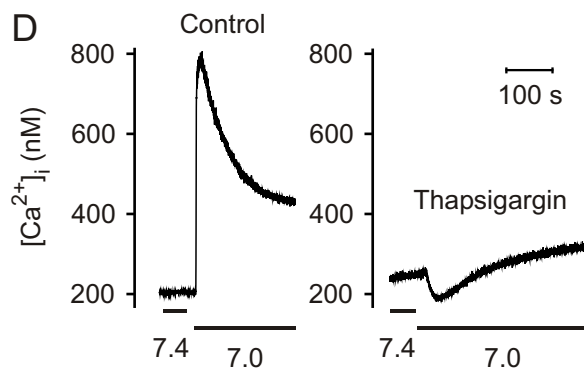

Supplement: pnas_102_7_2643__5.pdf [file pnas_102_7_2643__5.pdf]

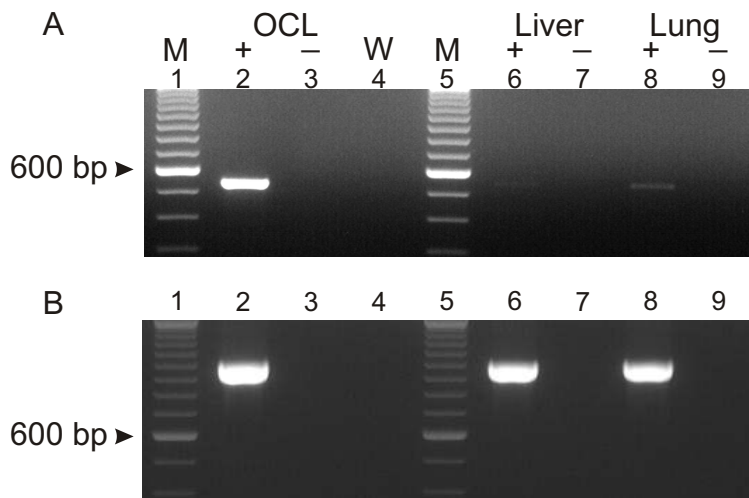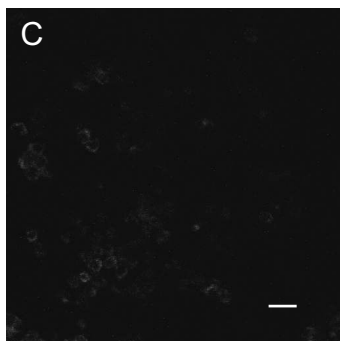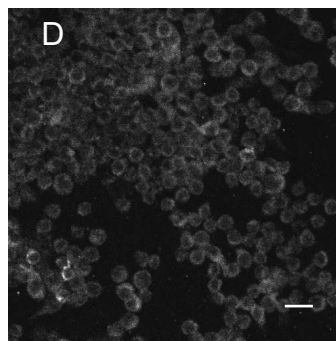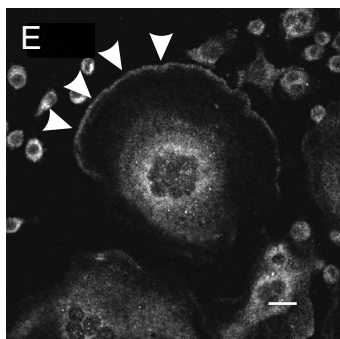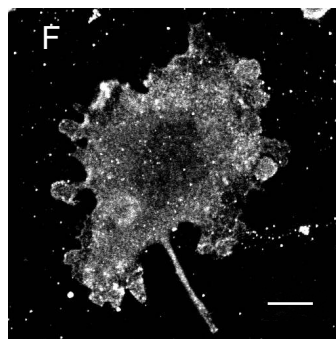

Supplement: pnas_102_7_2643__6.pdf [file pnas_102_7_2643__6.pdf]

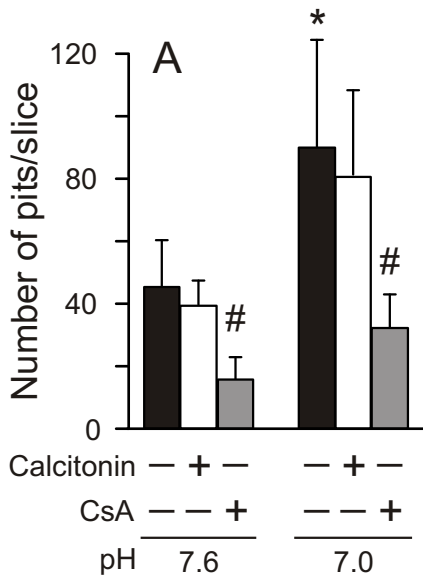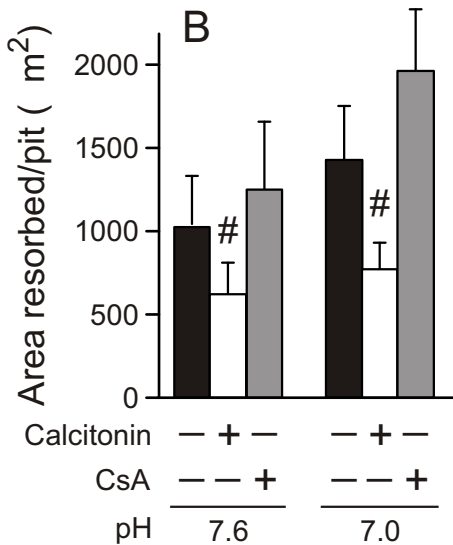

Supplement: pnas_102_7_2643__7.pdf [file pnas_102_7_2643__7.pdf]
